# Supplementary material for: Disruption of CCL2 in Mesenchymal Stem Cells as an Anti-Tumor Approach against Prostate Cancer
Source: MDPI journal article supplement (doi:10.3390/cancers15020441), 2023-01-10
Supplement: s1 [file s1]

## Supplementary Material

### Disruption of CCL2 in mesenchymal stem cells as an anti-tumor approach against prostate cancer

Supplementary Figure S1

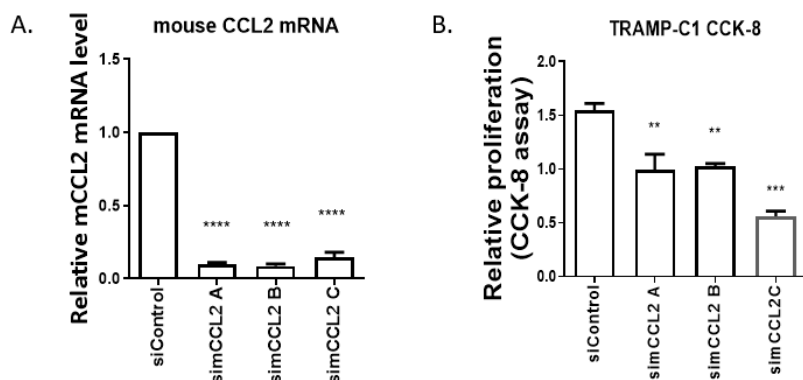

**Monitoring effect of CCL2 siRNA in proliferation.** A. A comparison of knockdown efficiencies of different siRNAs (simCCL2A-C). siControl serves negative control. B. Monitoring proliferation in TRAMP-C1 cell using CCK-8 assay.

Supplementary Figure S2

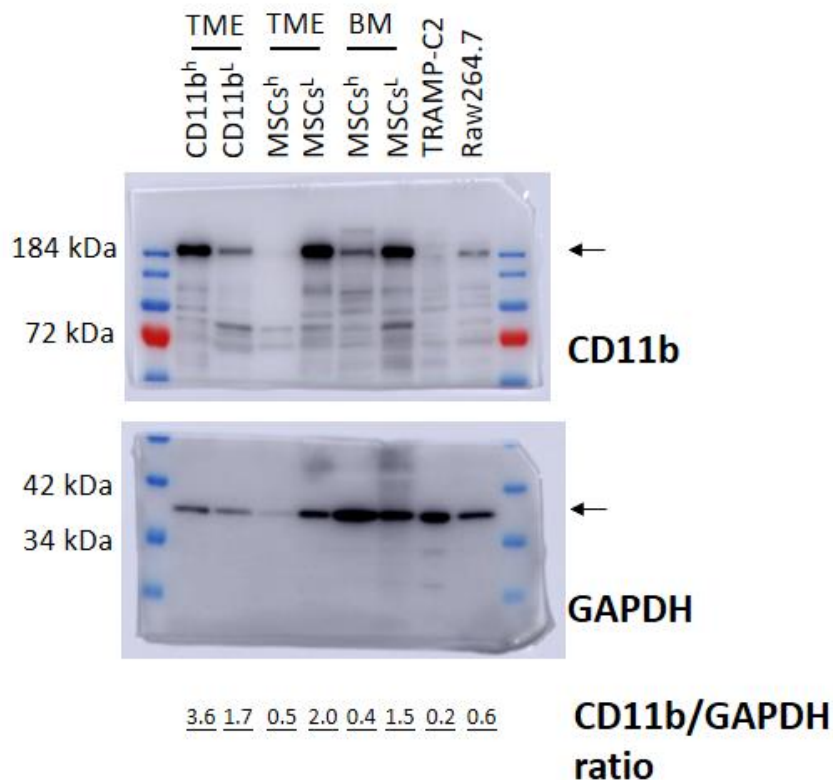

**Monitor CD11b expression.** Full images of the Western Blotting assay of Figure 2c. A comparison for different cell populations, leukocytes in the TME, bone marrow, and other cell lines. CD11b<sup>h</sup>:

enriched populations of tumor-infiltrating leukocytes in the TRAMP-C1-derived tumors were isolated by a CD11b enrichment kit. MSC<sup>h</sup>: enriched MSCs from the bone marrow (BM) by an MSCs enrichment kit. CD11b<sup>L</sup> and MSC<sup>L</sup>: non-enriched populations.

### Supplementary Figure S3

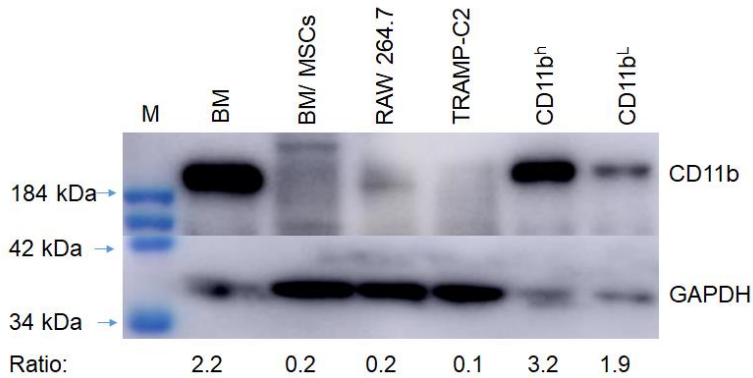

**CD11b expression in MSCs.** Comparison of CD11b expression in commercially purchased bone marrow-derived mouse MSCs (BM/MSCs) with other cell populations. CD11b<sup>h</sup> and CD11b<sup>L</sup> served as a positive and negative control, respectively.

### Supplementary Figure S4

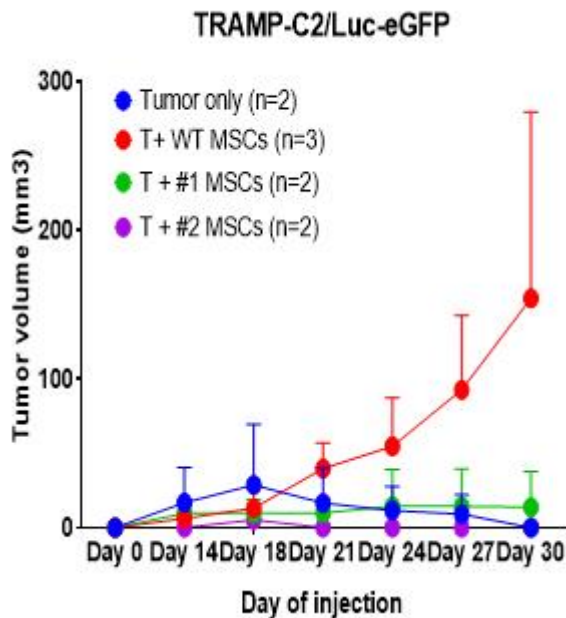

Tumor+ WT MSCs

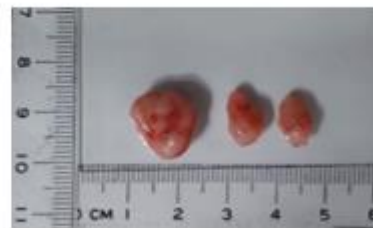

Tumor+ #1 MSCs

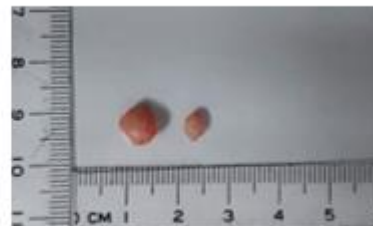

**Comparison of tumor growth rates using TRAMP-C2/ Luc-eGFP cell line in a syngeneic mouse model.** The TRAMP-C2 cell line stably expressing both EGFP and luciferase (Luc) genes (TRAMP-C2/Luc-eGFP) was established earlier. Immune competent, syngeneic mice (C57BL/6) were co-injected with TRAMP-C2/Luc-eGFP cells (T) and different MSCs (WT, KO #1, and KO #2). Tumor sizes were recorded at different days. WT: the parental BM/MSCs expressing CCL2. #1 & #2: the

two clones selected from the CCL2 KO MSCs. After sacrifice, only mice injected with tumor cells plus MSCs (WT & #1) had tumor formation. Mice injected with tumor cells only or with #2 MSCs did not show tumor formation.

**Supplementary Table S1.** Antibody information for Western blotting.

| Primary antibody | Clonality  | Source                 | Dilution | Secondary antibody | Source               | Dilution |
|------------------|------------|------------------------|----------|--------------------|----------------------|----------|
| GAPDH            | Polyclonal | GeneTex<br>(GTX100118) | 1/10000  | anti-rabbit IgG    | Croyez<br>Bioscience | 1/10000  |
| CD11b            | Polyclonal | ABclonal<br>(A1581)    | 1/1000   | anti-rabbit IgG    | Croyez<br>Bioscience | 1/10000  |

**Supplementary Table S2.** Antibody information for Flow cytometry.

| Primary antibody | Clonality  | Source                     | Dilution |
|------------------|------------|----------------------------|----------|
| CD45             | Monoclonal | BD Biosciences<br>(560501) | 1/100    |
| CD11b            | Monoclonal | BD Biosciences<br>(563168) | 1/50     |
| Ly6G             | Monoclonal | BioLegends<br>(127607)     | 1/50     |

**Supplementary Table S3:** Guide RNA (gRNA) sequences targeting the CCL2 genes.

| Gene   | 5'-3'                |
|--------|----------------------|
| CCL2 F | GGCCTGCTGTTACAGTTGC  |
| CCL2 R | GCAACTGTGAACAGCAGGCC |

**Supplementary Table S4.** Primer sequences for sequencing the INDEL mutation on KO genes.

| Gene   | 5'-3'                      |
|--------|----------------------------|
| CCL2 F | GCAGAGAGCCAGACGGGAG        |
| CCL2 R | ACCTGACCATGTGAGACTATGCTATC |

**Supplementary Table S5.** Small interfering RNA (siRNA) sequences targeting the CCL2 genes

| Gene       | 5'-3'                       |
|------------|-----------------------------|
| CCL2 set A | GAUGUUAUGGUAAUCCCUU[dT][dT] |
| CCL2 set B | CUAAUGCAUCCACUACCUU[dT][dT] |
| CCL2 set C | CUCAAGCACUUCUGUAGGA[dT][dT] |
